# Supplementary material
Source: PubMed Central journal article supplement (PMC4814375)
Supplement: NIHMS717987-supplement-supplement_1.pdf [file NIHMS717987-supplement-supplement_1.pdf]

# SF1

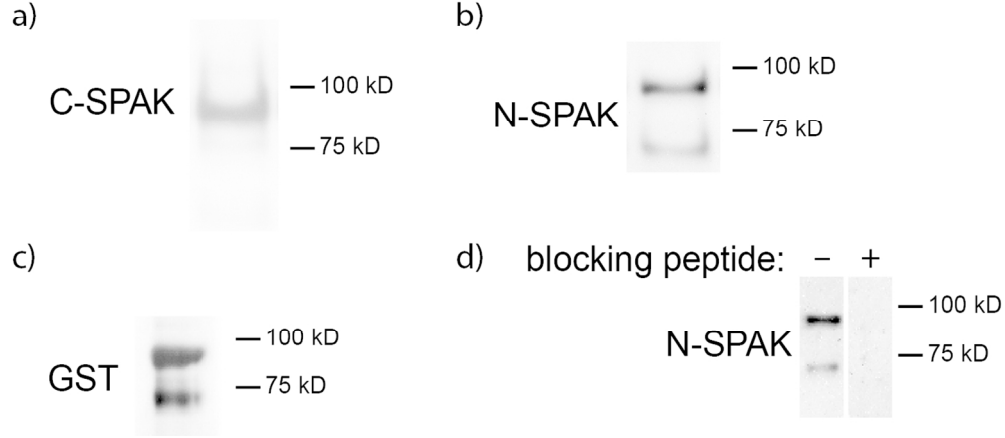

A fraction of GST-SPAK K104R produced in *E. coli* is truncated on its C-terminus. Western blots performed on recombinant GST-tagged SPAK K104R produced in *E. coli*. Blots were performed using antibodies directed at a) SPAK C-terminus, b) SPAK N-terminus, c) GST, and d) SPAK N-terminus with and without blocking peptide.

123x64mm (300 x 300 DPI)

## SF2

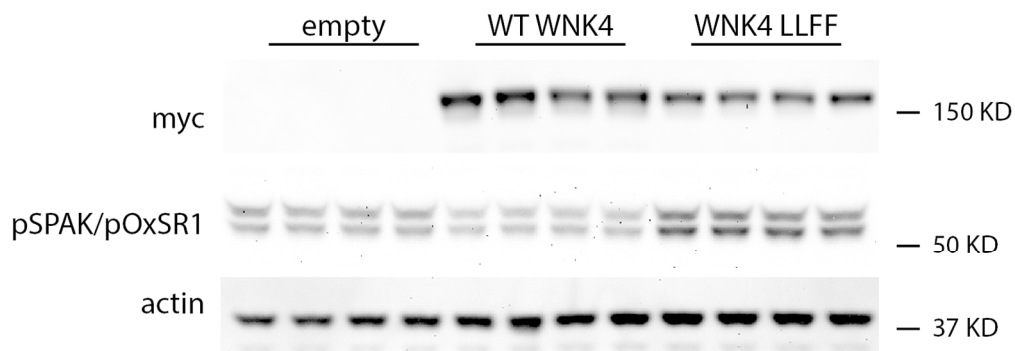

Effects of WT and WNK4 LLFF on SPAK/OxSR1 phosphorylation in HEK cells. Western blot for pSPAK/pOxSR1 on HEK cells transfected with empty vector, WT WNK4, or WNK4 L322F L324F (WNK4 LLFF). WT WNK4 reduced pSPAK/pOxSR1 abundance and WNK4 LLFF increased it. Both effects were significant ( $p < 0.05$ ) by one-way ANOVA with Dunnett's multiple comparisons test.  
137x57mm (300 x 300 DPI)
